# Supplementary material for: New forms of ecological knowledge acquisition for freshwater mussels’ conservation
Source: bioRxiv or medRxiv preprint supplement (doi:10.1101/2022.09.06.506734), 2022-09-07
Supplement: Supplementary file [file media-1.pdf]

New forms of ecological knowledge acquisition for freshwater mussels' conservation

**Supplementary material 1**

DATE ..... Nº SURVEY ..... PLACE .....

GENDER ..... ETHNIC BACKGROUND .....

AGE      18-40 years             40 – 60 years             > 60 years

Respondent's attitude: good/not very interested/not interested

Respondent's understanding: good/not very interested/not interested

We are studying the general knowledge about freshwater mussels. To do this we are surveying locals and tourists in the area. It would be helpful to know your opinion/perception through this survey. Remember that all responses are anonymous and it only takes a few minutes. There are no "right answers", just tell us what you think. Thank you for your help!

**Study area**

1.     Where do you live? ..... (Town)
2.     How often do you visit rivers or lakes? .....

**Freshwater mussels' knowledge**

1. - Do you know what freshwater mussels are?    NO    YES
2. - Do you know any problems related to freshwater mussels?    NO    YES

    If yes specify?.....

\*For the interviewer: Is she/he talking about Unionid mussels/Dressenid mussels

3. - Do you know any benefit related freshwater mussels??    NO    YES

    If yes specify?..... (e.g. food for humans, water purification, pearls)
